# Supplementary material for: Tunable NIR AIE-active optical materials for lipid droplet imaging in typical model organisms and photodynamic therapy
Source: Royal Society of Chemistry journal article supplement (doi:10.1039/d0tb02801k), 2021-01-01
Supplement: d0tb02801k1.pdf [file d0tb02801k1.pdf]

## Supporting Information

### **Tunable NIR AIE-active optical materials for lipid droplets imaging in typical model organism and photodynamic therapy**

Fei Zhang,<sup>a</sup> Yaoming Liu,<sup>b</sup> Binsheng Yang,<sup>a</sup> Pengli Guan,<sup>a</sup> Jie Chai,<sup>c</sup> Guangming Wen<sup>c</sup> and Bin Liu<sup>\*a</sup>

<sup>a</sup>*Institute of Molecular Science, Engineering Research Center for Sewage Treatment of Shanxi Province, Shanxi University, Taiyuan, China, 030006. E-mail: liubin@sxu.edu.cn.*

<sup>b</sup>*Scientific Instrument Center of Shanxi University, Taiyuan, China.*

<sup>c</sup>*Department of Chemistry, Jinzhong University, Jinzhong, 030619, China.*

#### **Contents**

- 1. Experimental section**
  - 2. Characterization of compounds**
  - 3. Particle size distributions**
  - 4. PL spectra in various solvents.**
  - 5. Cyclic voltammetric curves.**
  - 6. Cell imaging**
  - 7. Photostability analysis**
  - 8. Colocalization imaging of *Locusta migratoria* corpus adiposum**
  - 9. Colocalization imaging of *Caenorhabditis elegans***
  - 10. Colocalization imaging of zebrafish**
  - 11. Colocalization imaging of sunflower**
- Table S1. Crystal data and structure refinement of TPTIs**
- Table S2. Data of bandgaps of theoretical study and cyclic voltammetry**
- Table S3. Photophysical properties of LDs probes and their applications**

## 1. Experimental section

### 1.1. Materials and methods

All chemical materials and organic solvents were commercially available and used without any purification. 4-Bromo-N, N-diphenylaniline, (4-formylphenyl) boronic acid, (5-bromofuran-2-yl) boronic acid, (5-bromothiophen-2-yl) boronic acid, 3,5,5-trimethylcyclohex-2-en-1-one, malononitrile and [1,1'-Bis(diphenylphosphino)ferrocene] dichloropalladium were purchased from Aladdin. The product was purified by chromatography on silica gel (300–400 mesh). Buffer solution (PBS 1×, pH 7.4) was prepared with distilled water. <sup>1</sup>H NMR, <sup>13</sup>C NMR spectra were recorded on a Bruker Avance III-600MHz spectrometers. The chemical shift of NMR spectrum was expressed in ppm, relative to the internal standard of TMS (<sup>1</sup>H, 0.00 ppm). High resolution mass spectra were acquired using a Thermo Scientific Q Exactive LC-MS spectrometer. UV-vis spectra were recorded on a Hitachi 5300 absorption spectrophotometer. Fluorescence spectra were recorded on a Varian Cary Eclipse fluorescence spectrophotometer. Cyclic voltammetric measurements were carried out on a computer-controlled CHI 660C instrument. Absolute fluorescence quantum yield and decay time was measured on FLS980 (Edinburgh Instruments). Cell imaging and *in vivo* imaging were performed by using a confocal laser scanning microscope (Zeiss LSM-880). Density functional theory (DFT) calculations using the B3LYP functional were conducted with the Gaussian 09 software package. Dynamic light scattering (DLS) experiments were conducted with ALV5000 Laser Light Scattering Instrument.

### 1.2. Synthesis

#### 1.2.1. Synthesis of 2-(3,5,5-trimethylcyclohex-2-en-1-ylidene) malononitrile

The intermediates of 2-(3,5,5-trimethylcyclohex-2-en-1-ylidene) malononitrile was synthesized following the literature procedure.<sup>1</sup> <sup>1</sup>H NMR (600 MHz, CDCl<sub>3</sub>): 6.62–6.63 (m, 1H), 2.52 (s, 2H), 2.18 (s, 2H), 2.041–2.042 (d, *J* = 0.9 Hz, 3H), 1.02 (s, 6H).

#### 1.2.2. Synthesis of **TPB**

A mixture of 4-bromo-N,N-diphenylaniline (323 mg, 1.00 mmol), potassium carbonate (1.18 g, 10.0 mmol), (4-formylphenyl)boronic acid (0.150 g, 1.00 mmol) and [1,1'-Bis(diphenylphosphino)ferrocene]dichloropalladium (7.00 mg, 1 mol%) were dissolved in 10 mL of isopropyl alcohol with deionized water (10 mL) in a 50 mL three-neck bottle with a

magnetic stirring bar under nitrogen atmosphere. The reaction mixture was stirred at 100 °C for 2 h, then cooled to room temperature and the solvent was removed under vacuum. Deionized water (100 mL) was added to crude product and then extracted with ethyl acetate (30 mL × 3). The obtained yellow extraction was dried with Na<sub>2</sub>SO<sub>4</sub>, and then the solvent was evaporated. The crude solid product was purified by column chromatography (V<sub>petroleum ether</sub>: V<sub>CH<sub>2</sub>Cl<sub>2</sub></sub>, 1:1). The final product was yellow powdery solid (0.320 g, 92%). <sup>1</sup>H NMR (600 MHz, CDCl<sub>3</sub>): 10.05 (s, 1H), 7.95 (d, *J* = 8.04 Hz, 2H), 7.76 (d, *J* = 8.10 Hz, 2H), 7.55 (d, *J* = 8.54 Hz, 2H), 7.32 (t, *J* = 7.64 Hz, 4H), 7.18 (d, *J* = 2.69 Hz, 3H), 7.17 (d, *J* = 3.07 Hz, 3H), 7.10 (t, *J* = 7.32 Hz, 2H).

### 1.2.3. Synthesis of **TPF**

The synthetic procedure was the same as that of **TPB**. The obtained product was yellow oily liquid (0.820 g, 80%). <sup>1</sup>H NMR (600 MHz, CDCl<sub>3</sub>): 9.61 (s, 1H), 7.69 (t, *J* = 8.98 Hz, 1H), 7.67 (t, *J* = 2.18 Hz, 1H), 7.33 (t, *J* = 2.04 Hz, 1H), 7.32 (d, *J* = 1.10 Hz, 3H), 7.30 (t, *J* = 2.04 Hz, 1H), 7.17 (d, *J* = 1.09 Hz, 2H), 7.16 (d, *J* = 1.09 Hz, 2H), 7.13 (t, *J* = 1.04 Hz, 1H), 7.12 (d, *J* = 1.09 Hz, 1H), 7.11 (d, *J* = 1.46 Hz, 2H), 7.09 (t, *J* = 2.08 Hz, 1H).

### 1.2.4. Synthesis of **TPT**

The synthetic procedure was the same as that of **TPF**, and the obtained product was yellow solid (0.120 g, 34%). <sup>1</sup>H NMR (600 MHz, CDCl<sub>3</sub>): 9.88 (s, 1H), 7.73 (d, *J* = 3.89 Hz, 1H), 7.55 (t, *J* = 1.95 Hz, 1H), 7.53 (t, *J* = 1.95 Hz, 1H), 7.33 (d, *J* = 2.00 Hz, 1H), 7.32 (d, *J* = 1.15 Hz, 3H), 7.31 (d, *J* = 1.92 Hz, 1H), 7.17 (d, *J* = 1.04 Hz, 2H), 7.15 (d, *J* = 0.96 Hz, 2H), 7.11 (t, *J* = 0.81 Hz, 1H), 7.09 (t, *J* = 2.15 Hz, 3H).

### 1.2.5. Synthesis of **TPBIs**

A solution of **TPB** (0.349 g, 1.00 mmol) and 2-(3,5,5-trimethylcyclohex-2-en-1-ylidene) malononitrile (0.186 g, 1.00 mmol) were refluxed in dry acetonitrile with a drop of piperidine as catalyst for 2 h, then cooled to room temperature. The mixture was filtered and the product was obtained as red solid (0.185 g, 36%). <sup>1</sup>H NMR (600 MHz, CDCl<sub>3</sub>) (Fig. S1): 7.64 (d, *J* = 5.84 Hz, 2H), 7.58 (d, *J* = 5.16 Hz, 2H), 7.52 (d, *J* = 6.54 Hz, 2H), 7.30 (d, *J* = 7.93 Hz, 4H), 7.28 (t, *J* = 3.32 Hz, 2H), 7.16 (t, *J* = 3.48 Hz, 4H), 7.09 (d, *J* = 10.38 Hz, 2H), 7.06 (s, 1H), 7.03 (s, 1H), 6.88 (s, 1H), 2.63 (s, 2H), 2.51 (s, 2H), 1.11 (s, 6H). <sup>13</sup>C NMR (150 MHz, CDCl<sub>3</sub>) (Fig. S2): 169.22, 153.93, 147.82, 147.48, 141.94, 136.75, 134.07, 133.49, 129.36, 128.74, 128.13, 127.59, 126.98, 124.68, 124.57, 123.49, 123.25, 113.59, 112.82, 43.03, 39.25,

32.07, 28.06. ESI mass spectrometry (Fig. S3):  $m/z = 518.2585$   $[M+H]^+$ ,  $[M+H]^+$  calculated 518.2591.

#### 1.2.6. Synthesis of **TPFI**s

The synthetic procedure was the same as that of **TPBI**s. The product was obtained as black solid (0.150 g, 30%).  $^1\text{H}$  NMR (600 MHz,  $\text{CDCl}_3$ ) (Fig. S4): 7.61 (d,  $J = 7.38$  Hz, 2H), 7.31 (d,  $J = 4.92$  Hz, 3H), 7.28 (t,  $J = 1.68$  Hz, 2H), 7.16 (d,  $J = 6.12$  Hz, 4H), 7.10 (t,  $J = 6.06$  Hz, 4H), 6.94 (d,  $J = 8.12$  Hz, 1H), 6.86 (s, 1H), 6.65 (s, 2H), 2.60 (s, 2H), 2.43 (s, 2H), 1.09 (s, 6H).  $^{13}\text{C}$  NMR (150 MHz,  $\text{CDCl}_3$ ) (Fig. S5): 168.83, 154.97, 153.67, 148.26, 147.38, 147.28, 147.17, 146.60, 139.81, 133.52, 131.51, 130.13, 129.51, 129.44, 129.41, 128.27, 127.73, 127.26, 127.04, 126.78, 126.68, 126.52, 124.94, 124.85, 123.61, 123.17, 122.91, 122.85, 113.03, 76.83, 42.94, 39.15, 32.02, 28.04, 27.81. ESI mass spectrometry (Fig. S6):  $m/z = 508.2377$   $[M+H]^+$ ,  $[M+H]^+$  calculated 508.2383.

#### 1.2.7. Synthesis of **TPTI**s

The synthetic process was the same as that of **TPFI**s, and the obtained product was black solid (0.200 g, 38%).  $^1\text{H}$  NMR (600 MHz,  $\text{CDCl}_3$ ) (Fig. S7): 7.48 (d,  $J = 4.14$  Hz, 2H), 7.30 (d,  $J = 4.92$  Hz, 3H), 7.28 (d,  $J = 8.80$  Hz, 3H), 7.19 (s, 1H), 7.16 (d,  $J = 8.80$  Hz, 5H), 7.09 (d,  $J = 7.62$  Hz, 4H), 6.81 (s, 1H), 2.60 (s, 2H), 2.44 (s, 2H), 1.09 (s, 6H).  $^{13}\text{C}$  NMR (150 MHz,  $\text{CDCl}_3$ ) (Fig. S8): 168.56, 155.52, 154.27, 147.53, 147.42, 147.39, 147.28, 146.20, 138.27, 135.76, 134.23, 133.33, 130.35, 128.36, 128.55, 127.36, 126.33, 126.13, 125.33, 125.14, 125.04, 124.38, 123.67, 122.80, 122.52, 122.03, 121.03, 120.35, 115.05, 76.22, 43.25, 40.15, 33.05, 28.28, 27.35. ESI mass spectrometry (Fig. S9):  $m/z = 524.2145$   $[M+H]^+$ ,  $[M+H]^+$  calculated 524.2155.

### 1.3. Cell culture

The human liver cancer cells line SMMC-7721 and PC12 cells were supplied by the cell resource center of Chinese academy sciences. They were cultured at 37 °C and 5%  $\text{CO}_2$  incubator in RPMI-1640 medium containing 10% fetal bovine serum (FBS) and 1% penicillin-streptomycin ( $10^4$  U $\cdot\text{mL}^{-1}$  penicillin and  $10^4$   $\mu\text{g}\cdot\text{mL}^{-1}$  streptomycin).

## 2. Characterization of compounds

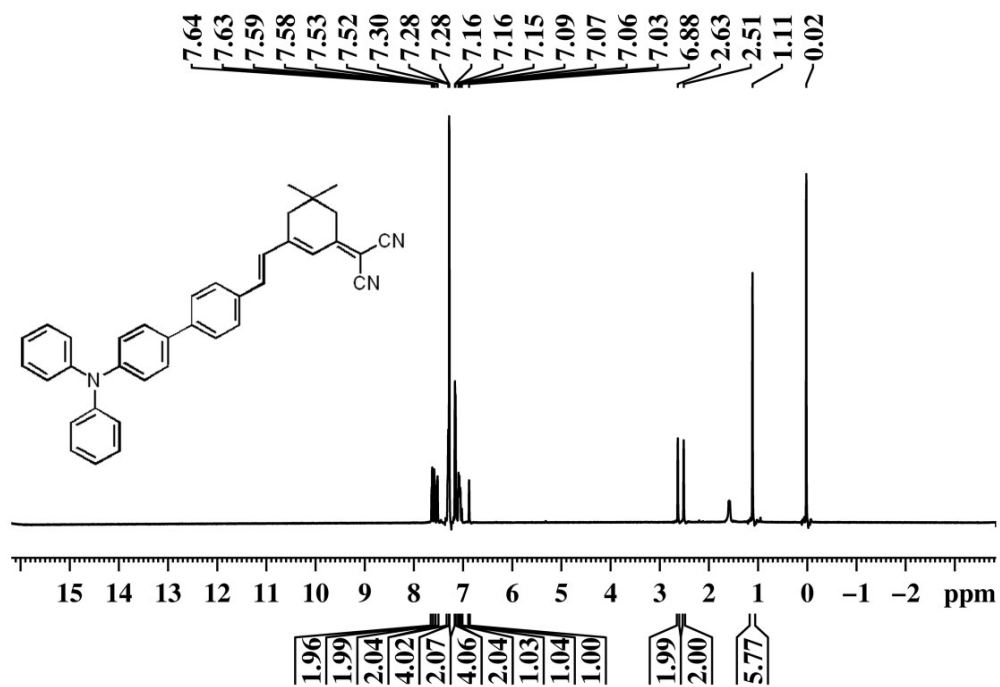

Fig. S1 <sup>1</sup>H NMR of TPBIs in CDCl<sub>3</sub>.

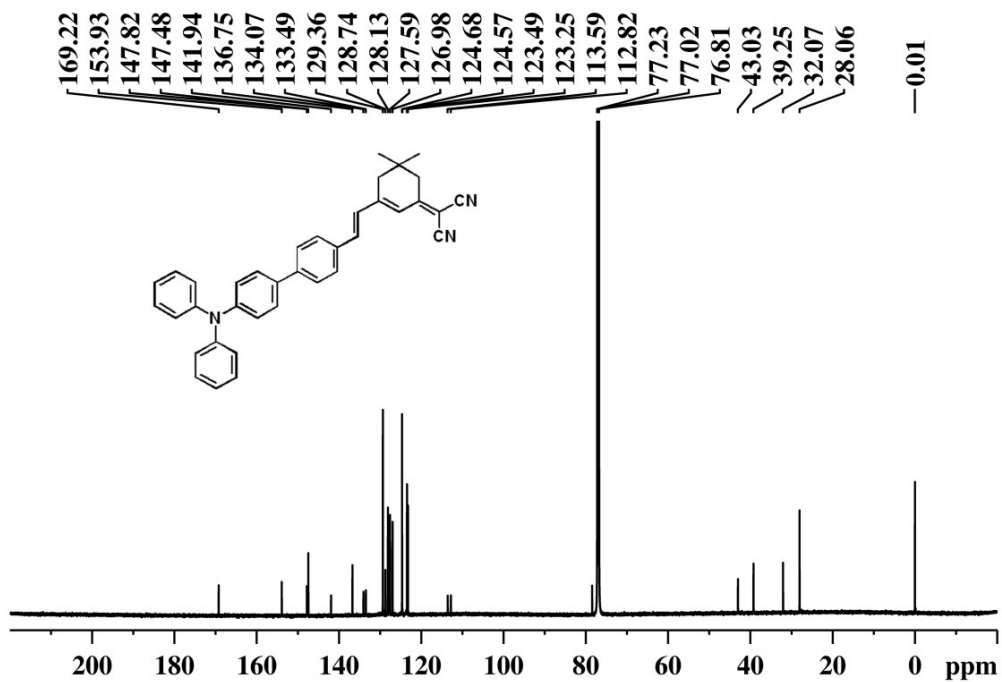

Fig. S2 <sup>13</sup>C NMR of TPBIs in CDCl<sub>3</sub>.

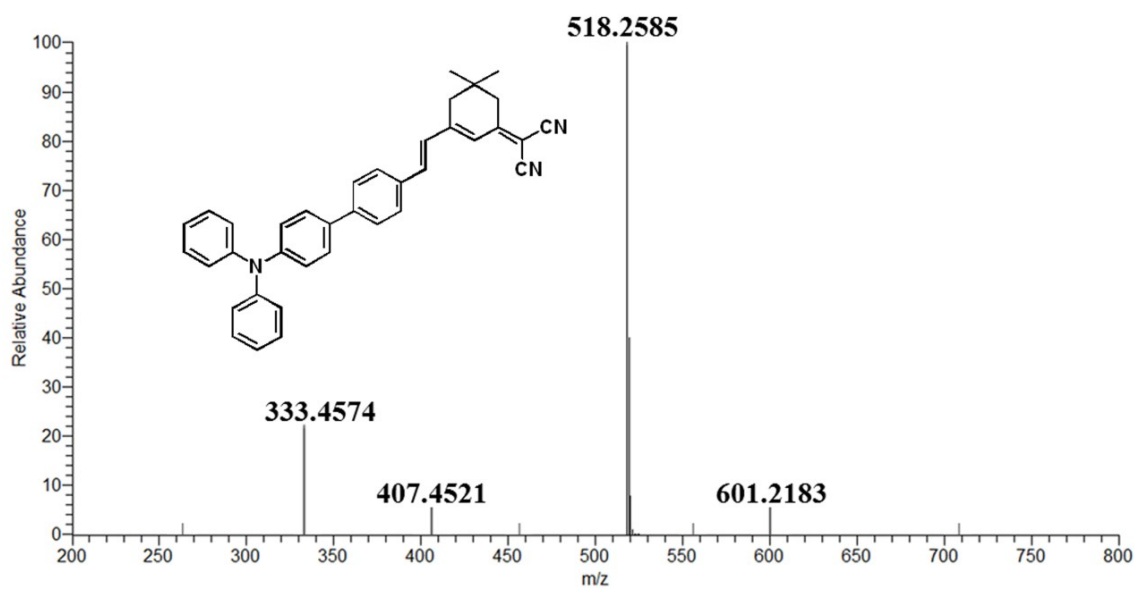

**Fig. S3** ESI-MS spectrum of TPBIs.

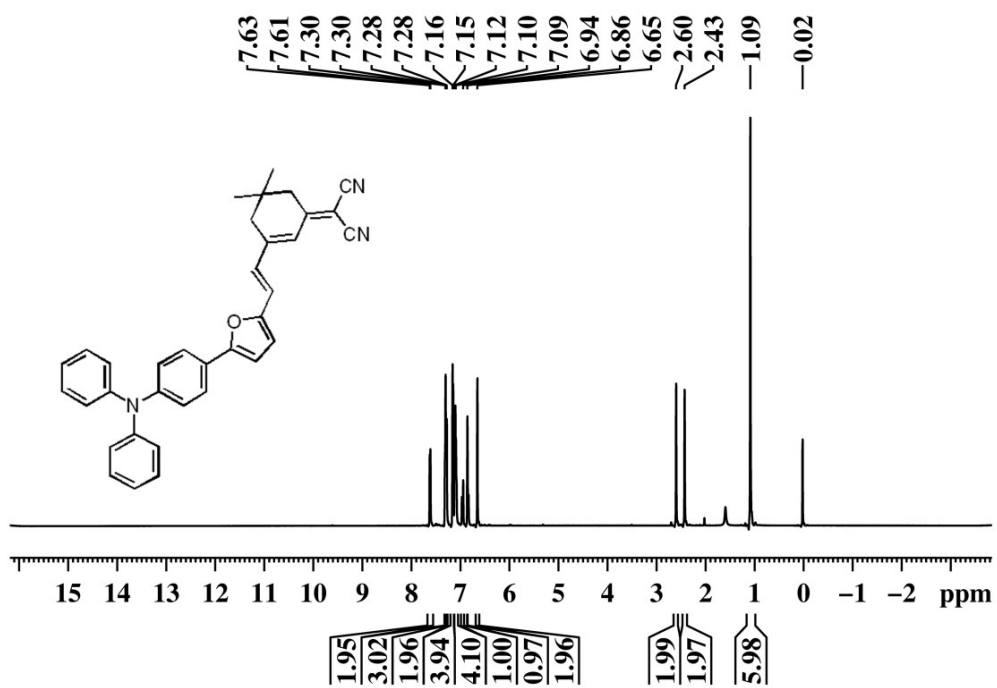

**Fig. S4** <sup>1</sup>H NMR of TPBIs in CDCl<sub>3</sub>.

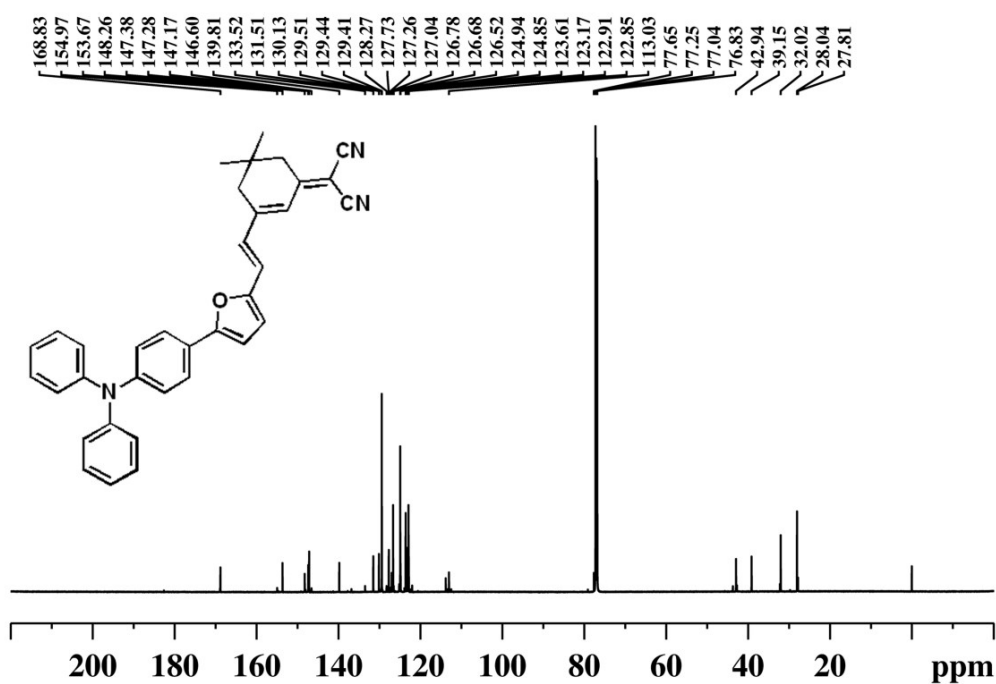

Fig. S5 <sup>13</sup>C NMR of TPFIs in CDCl<sub>3</sub>.

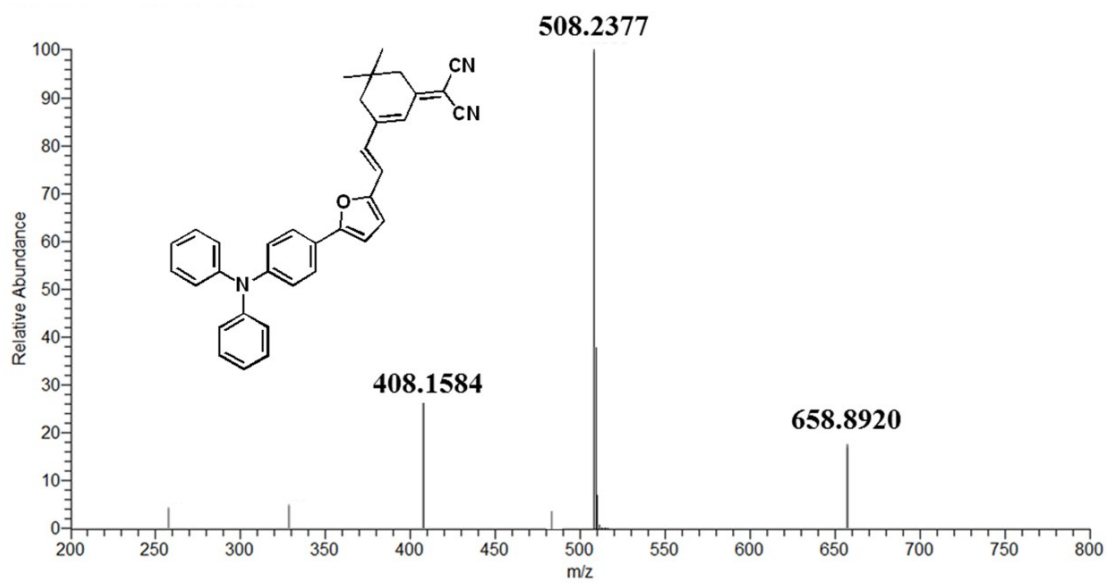

Fig. S6 ESI-MS spectrum of TPFIs.

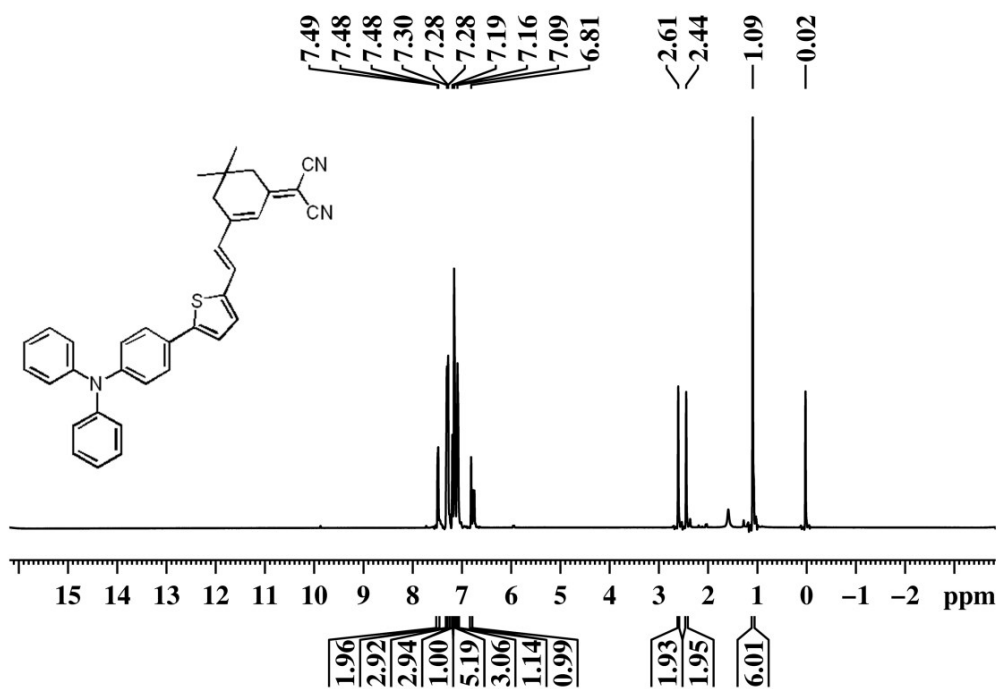

Fig. S7 <sup>1</sup>H NMR of TPTIs in CDCl<sub>3</sub>.

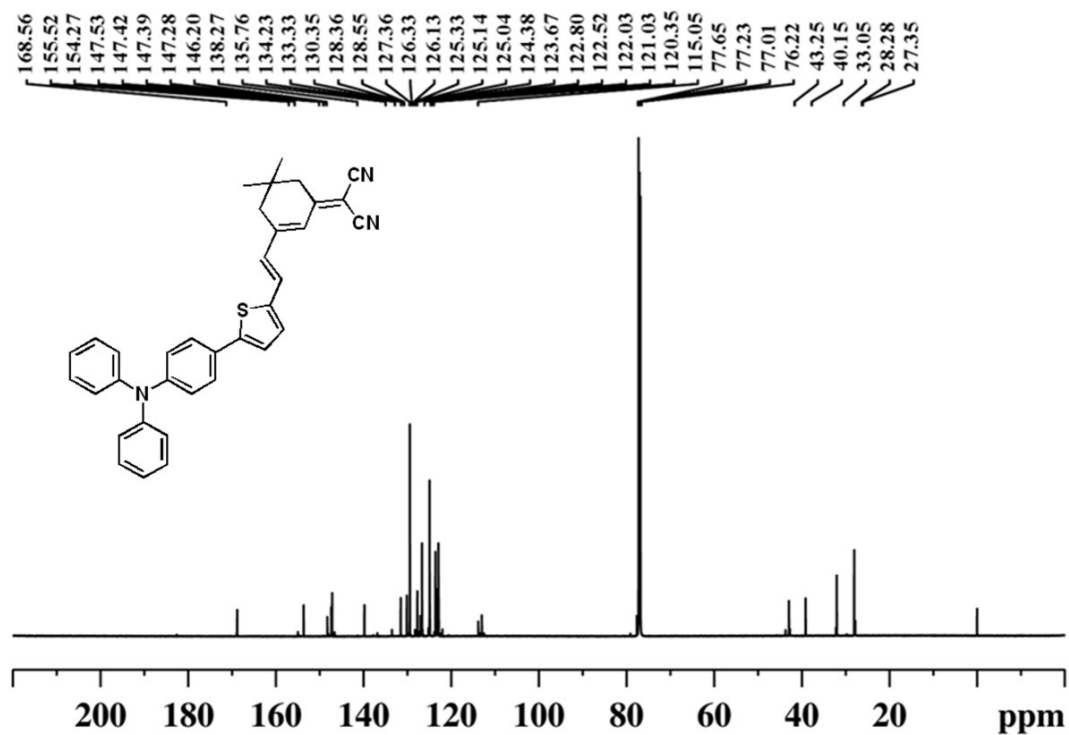

Fig. S8 <sup>13</sup>C NMR of TPTIs in CDCl<sub>3</sub>.



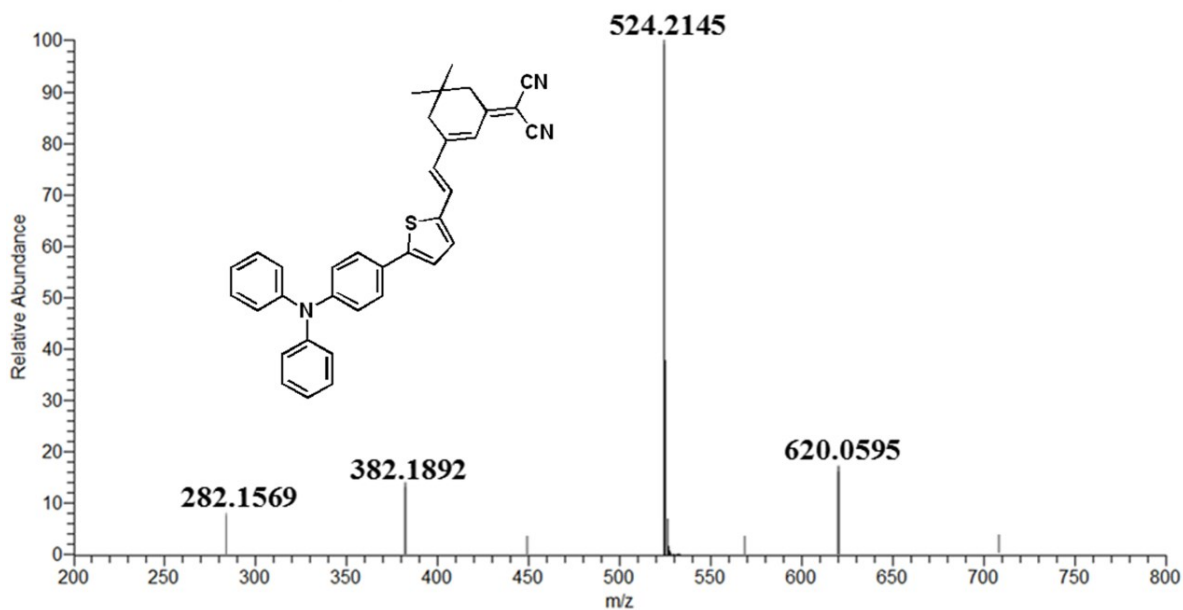

**Fig. S9** ESI-MS spectrum of TPTIs.

### 3. Particle size distributions

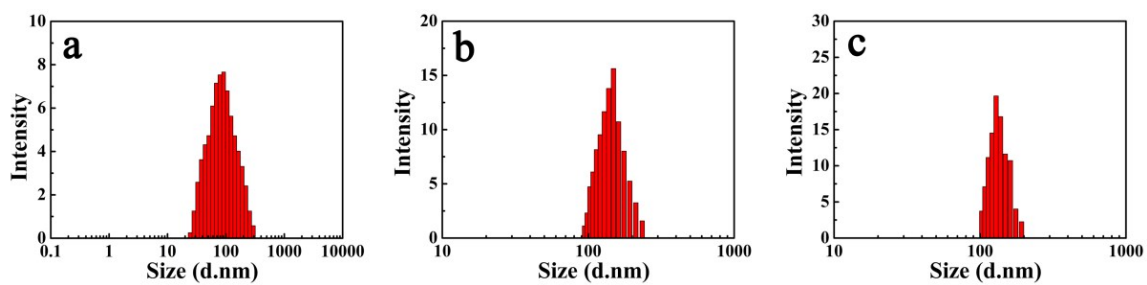

**Fig. S10** Particle size distributions of TPBIs (a), TPFIs (b) and TPTIs (c) in toluene.

Concentration: 10  $\mu$ M.

#### 4. PL spectra in various solvents.

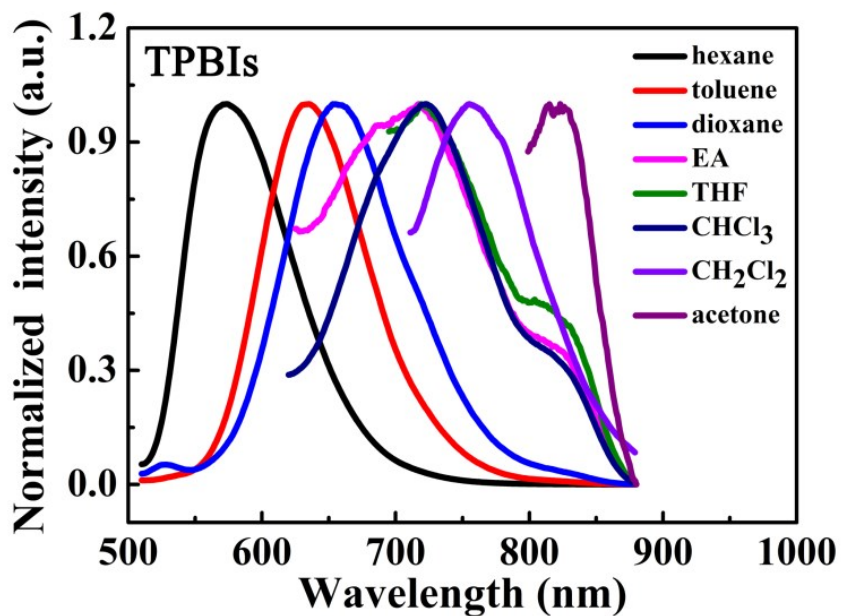

Fig. S11 Normalized PL spectra of TPBIs in various solvents.

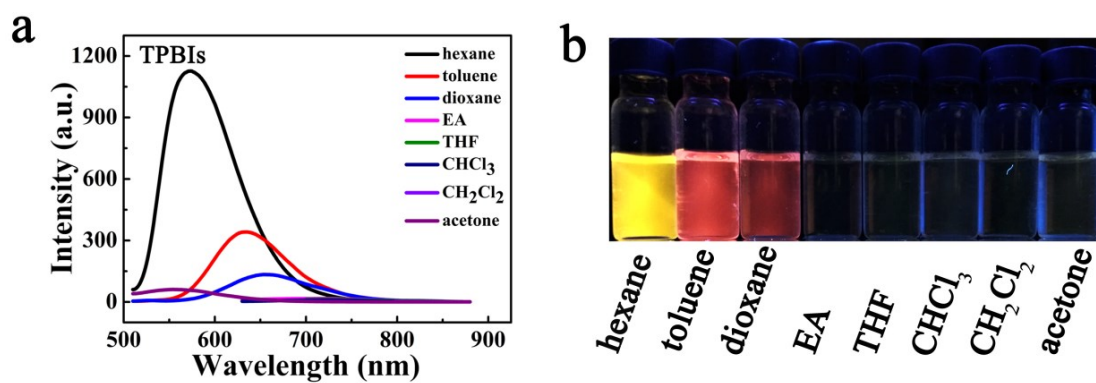

Fig. S12 a) PL spectra of TPBIs in various solvents. Concentration: 1.0  $\mu$ M; excitation wavelength: 494 nm. b) Photographs: showing the solution under UV light.

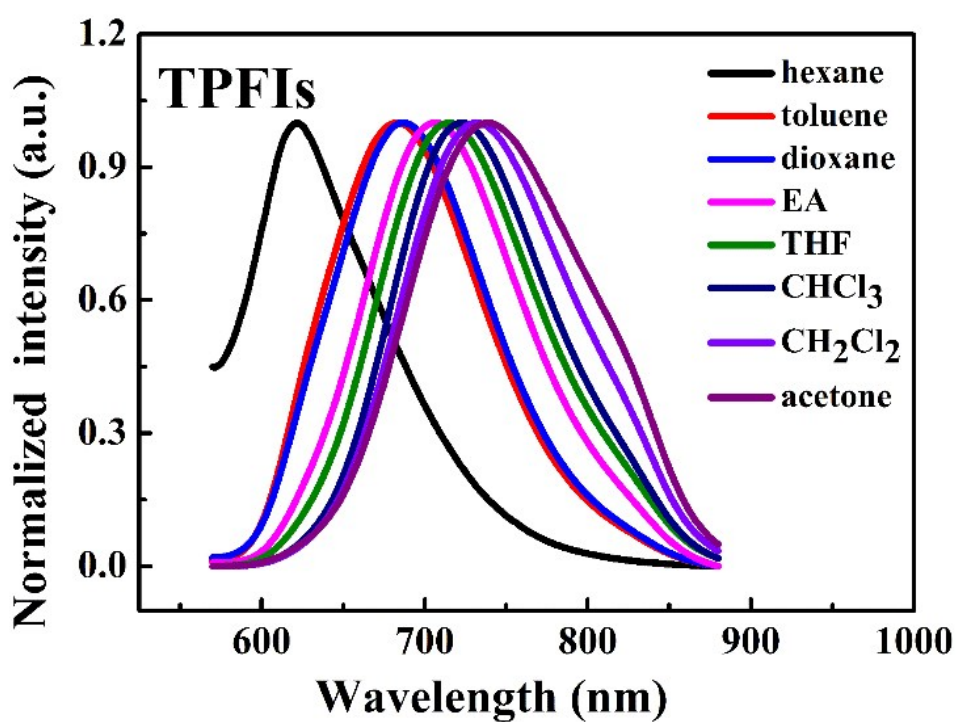

Fig. S13 Normalized PL spectra of TPFIs in various solvents.

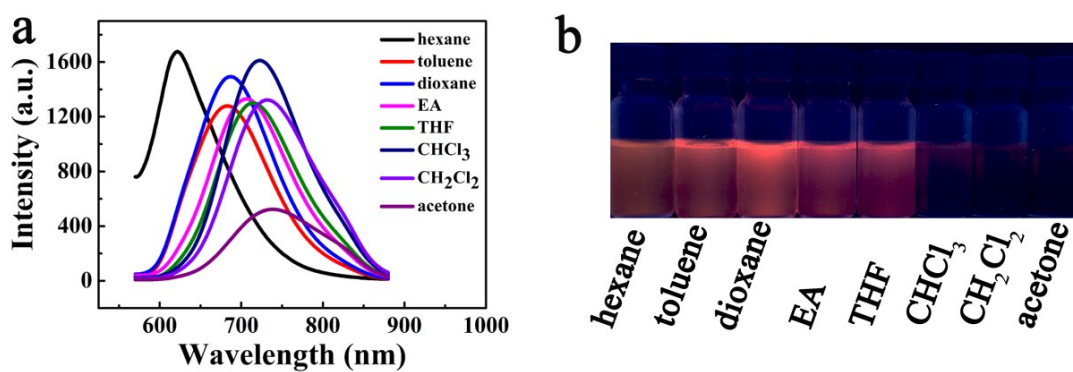

Fig. S14 a) PL spectra of TPFIs in various solvents. Concentration: 1.0  $\mu\text{M}$ ; excitation wavelength: 549 nm. b) Photographs: showing the solution under UV light.

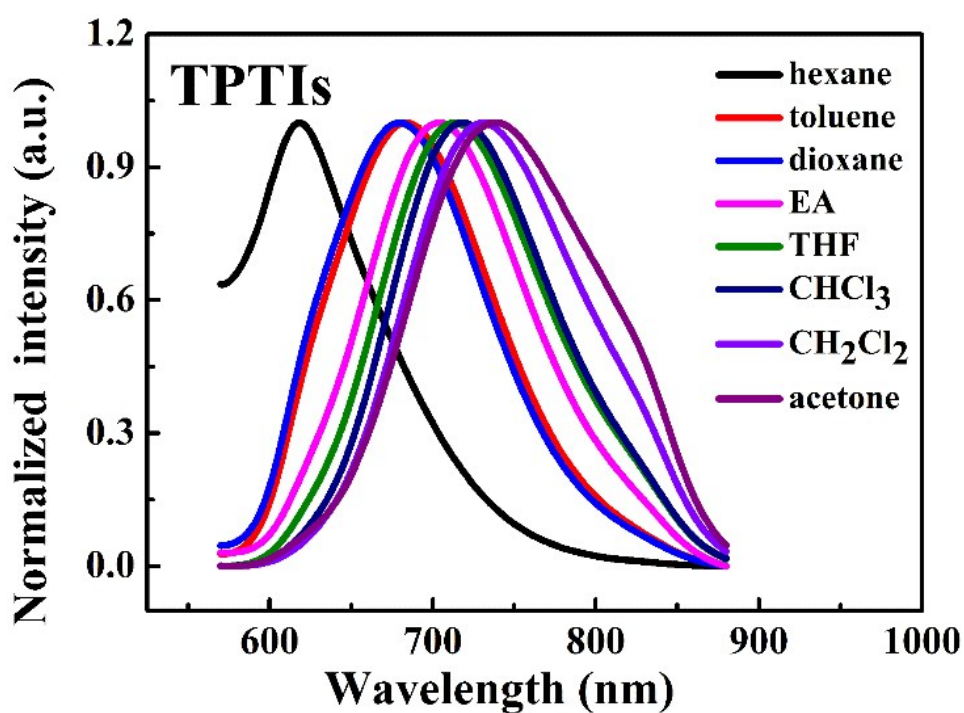

Fig. S15 Normalized PL spectra of TPTIs in various solvents.

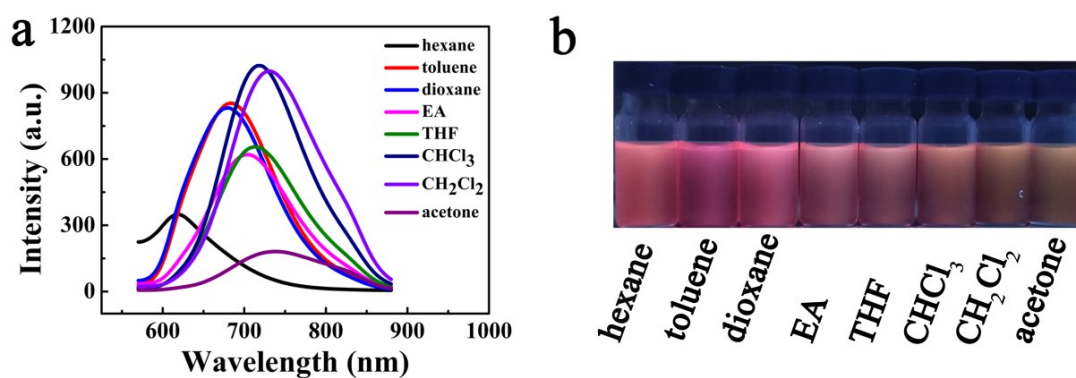

Fig. S16 a) PL spectra of TPTIs in various solvents. Concentration: 1  $\mu$ M; excitation wavelength: 547 nm. b) Photographs: showing the solution under UV light.

## 5. Cyclic voltammetric curves.

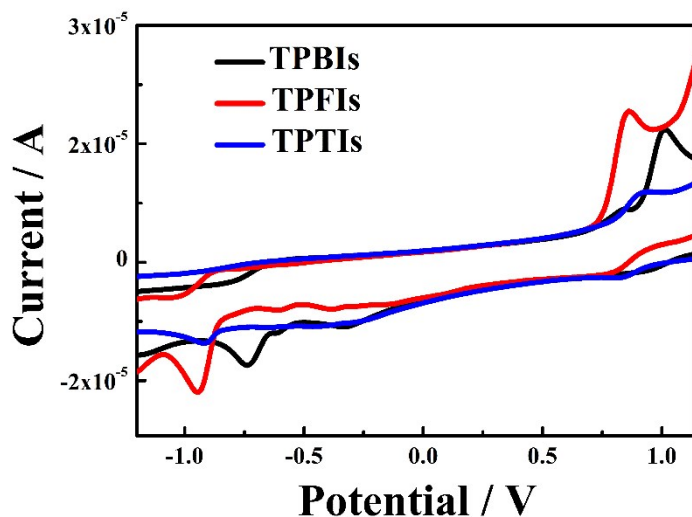

Fig. S17 Cyclic voltammetric curves of TPBIs, TPFIs and TPTIs in acetonitrile.

Concentration: 100  $\mu\text{M}$ .

## 6. Cell imaging

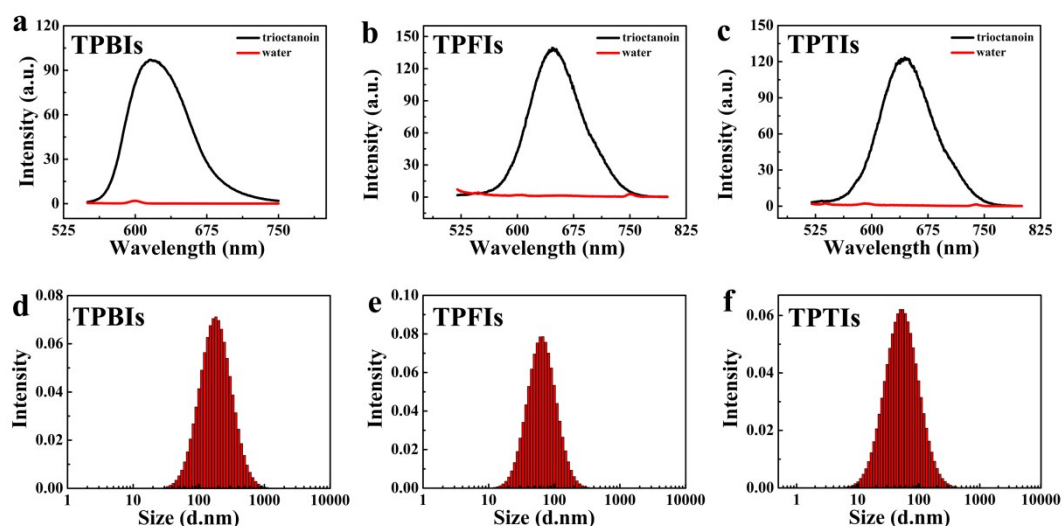

Fig. S18 PL spectra of TPBIs (a), TPFIs (b) and TPTIs (c) in trioctanoin and water.

Concentration: 1.0  $\mu\text{M}$ ; excitation wavelength: 488 nm. b) Particle size distributions of TPBIs

(d), TPFIs (e) and TPTIs (f) in aqueous solution with 1 % DMSO. Concentration: 1.0  $\mu\text{M}$ .

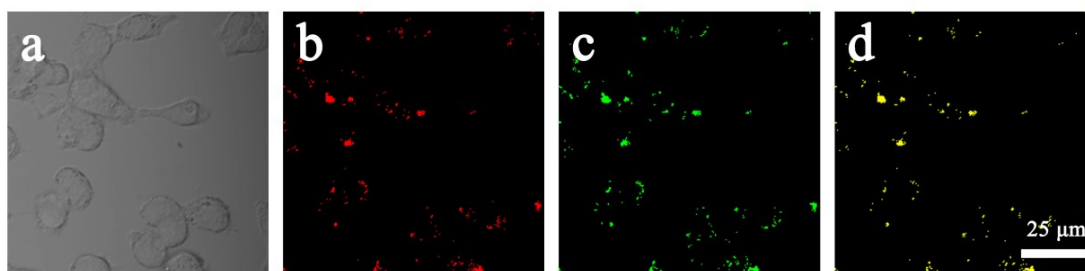

**Fig. S19** Colocalization imaging of PC12 incubated with **TPFIs** and BODIPY493/503 Green. a) Bright-field, b) red channel and c) green channel. d) merged images of panels (b) and (c). For **TPFIs**,  $\lambda_{\text{ex}} = 488 \text{ nm}$ ,  $\lambda_{\text{em}} = 600\text{--}750 \text{ nm}$ ; For BODIPY 493/503,  $\lambda_{\text{ex}} = 488 \text{ nm}$ ,  $\lambda_{\text{em}} = 500\text{--}570 \text{ nm}$ . Concentrations: **TPFIs** ( $1 \times 10^{-6} \text{ M}$ ), BODIPY493/503 Green ( $1.0 \times 10^{-6} \text{ M}$ ).

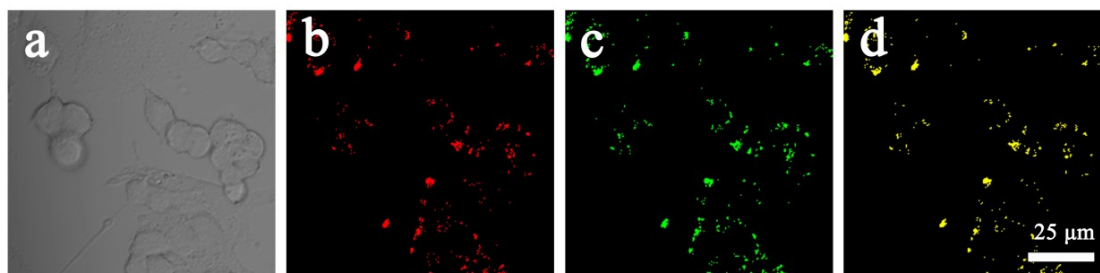

**Fig. S20** Colocalization imaging of PC12 incubated with **TPTIs** and BODIPY493/503 Green. a) Bright-field, b) red channel and c) green channel. d) merged images of panels (b) and (c). For **TPTIs**,  $\lambda_{\text{ex}} = 488 \text{ nm}$ ,  $\lambda_{\text{em}} = 600\text{--}750 \text{ nm}$ ; For BODIPY 493/503,  $\lambda_{\text{ex}} = 488 \text{ nm}$ ,  $\lambda_{\text{em}} = 500\text{--}570 \text{ nm}$ . Concentrations: **TPTIs** ( $1 \times 10^{-6} \text{ M}$ ), BODIPY493/503 Green ( $1.0 \times 10^{-6} \text{ M}$ ).



## 7. Photostability analysis

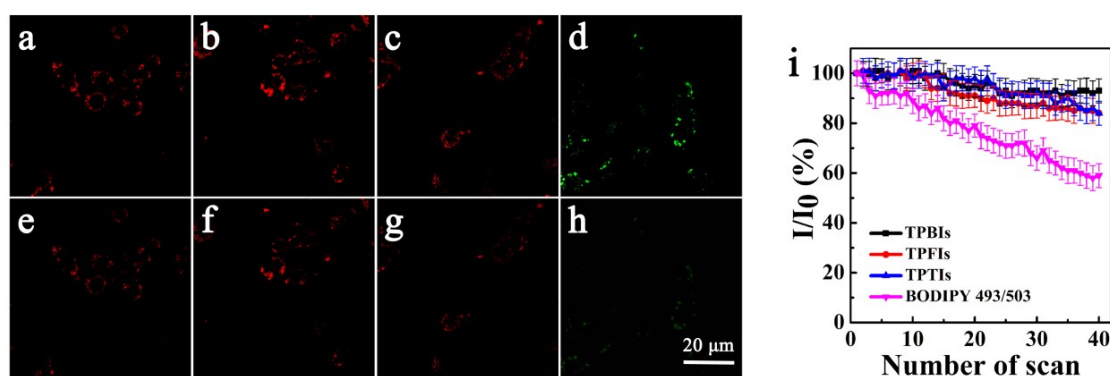

**Fig. S21** Confocal images of PC12 cells a–d) before and e–h) after the laser irradiation for 15 min stained with a, e) **TPBIs**, b, f) **TPFIs**, c, g) **TPTIs**, and d, h) BODIPY493/503 Green i) Loss of fluorescence in PC12 cells stained with AIEgens and BODIPY493/503 Green. Concentration: 0.1 μM (**TPBIs**, **TPFIs**, and **TPTIs**) and 0.2 μM (BODIPY493/503 Green).  $\lambda_{\text{ex}}$ : 488 nm, laser power of confocal fluorescence microscope: 0.5 μW.

## 8. Colocalization imaging of *Locusta migratoria* corpus adiposum

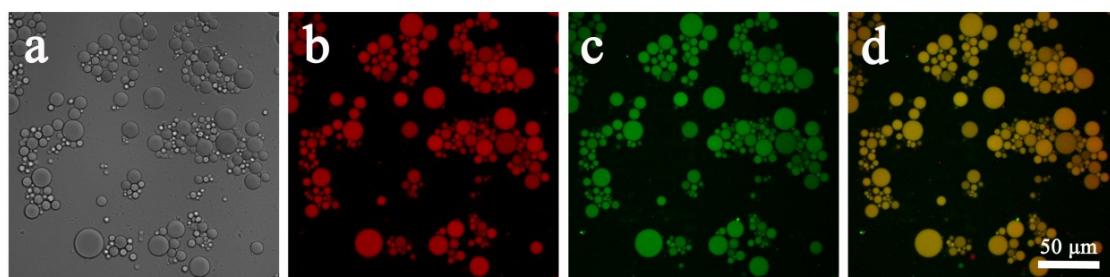

**Fig. S22** Colocalization imaging of *Locusta migratoria* corpus adiposum incubated with **TPFIs** and BODIPY493/503 Green. a) Bright-field, b) red channel and c) green channel. d) merged images of panels (b) and (c). For **TPFIs**,  $\lambda_{\text{ex}}$  = 488 nm,  $\lambda_{\text{em}}$  = 600–750 nm; For BODIPY 493/503,  $\lambda_{\text{ex}}$  = 488 nm,  $\lambda_{\text{em}}$  = 500–570 nm. Concentrations: **TPFIs** ( $1.0 \times 10^{-6}$  M), BODIPY493/503 Green ( $1 \times 10^{-6}$  M).

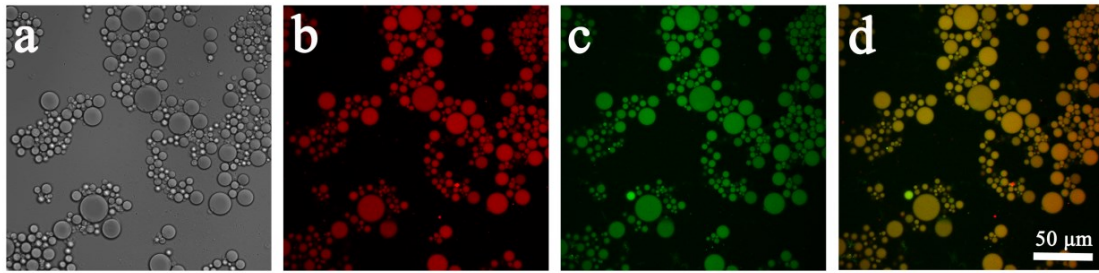

**Fig. S23** Colocalization imaging of *Locusta migratoria* corpus adiposum incubated with **TPTIs** and BODIPY493/503 Green. a) Bright-field, b) red channel and c) green channel. d) merged images of panels (b) and (c). For **TPTIs**,  $\lambda_{\text{ex}} = 488 \text{ nm}$ ,  $\lambda_{\text{em}} = 600\text{--}750 \text{ nm}$ ; For BODIPY 493/503,  $\lambda_{\text{ex}} = 488 \text{ nm}$ ,  $\lambda_{\text{em}} = 500\text{--}570 \text{ nm}$ . Concentrations: **TPTIs** ( $1.0 \times 10^{-6} \text{ M}$ ), BODIPY493/503 Green ( $1 \times 10^{-6} \text{ M}$ ).



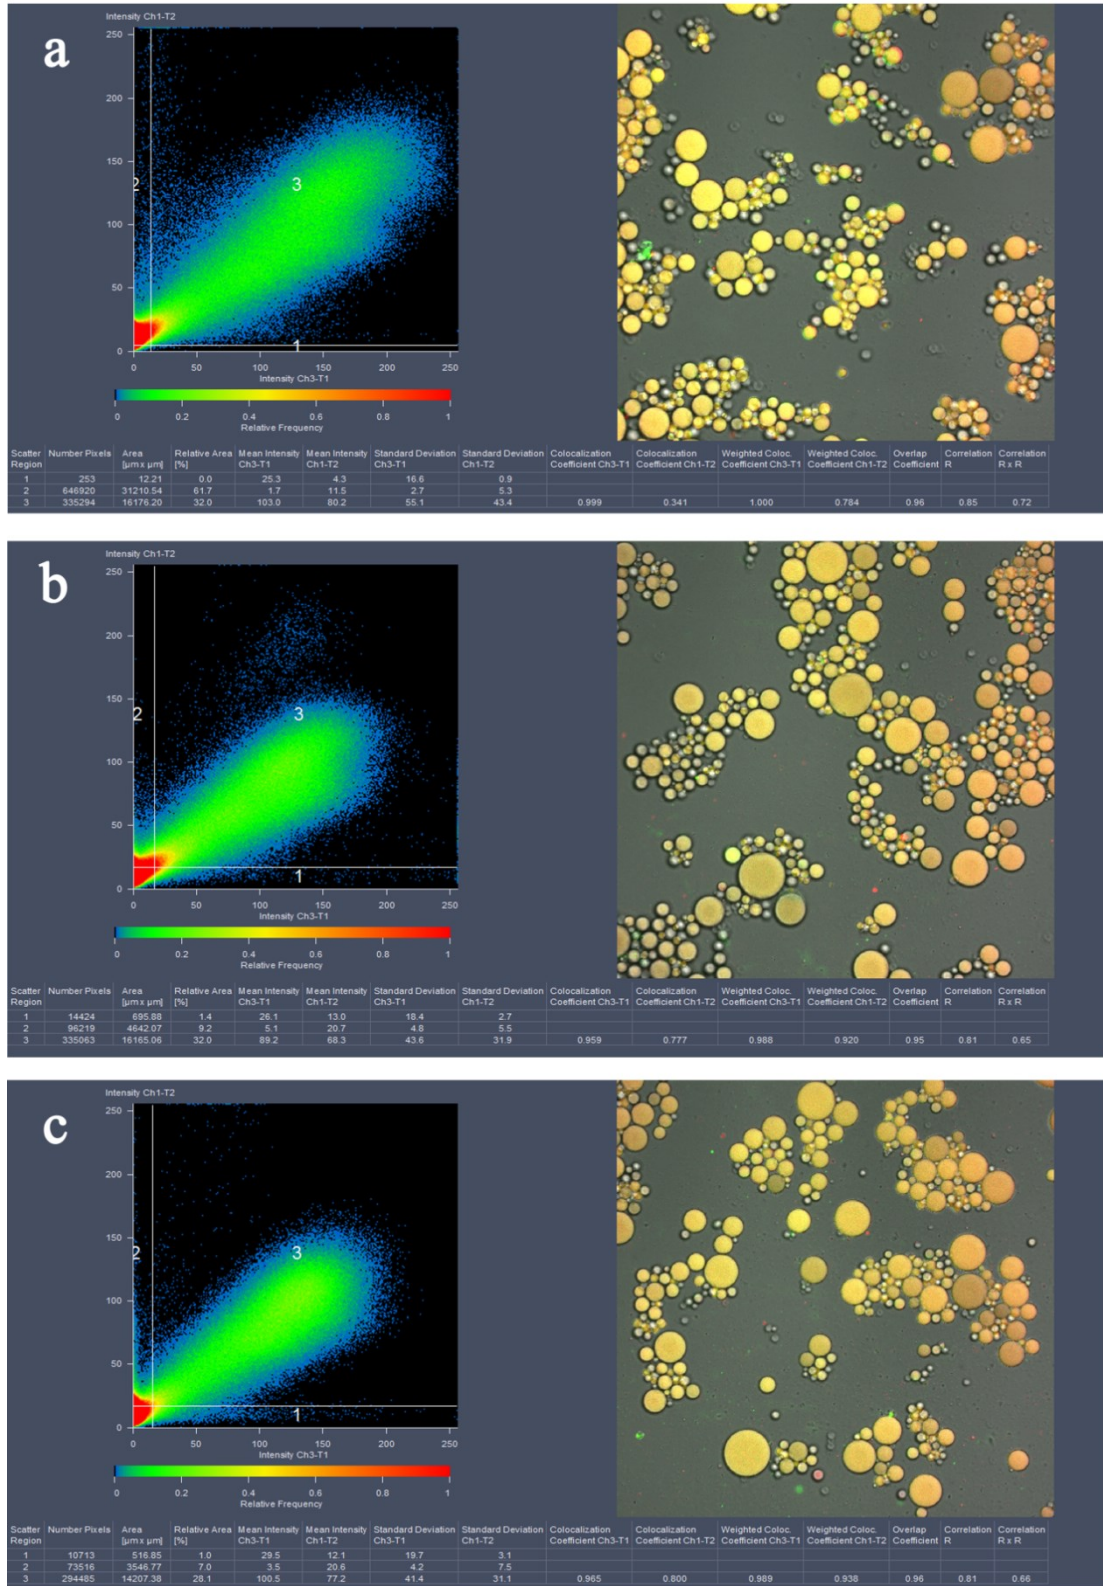

**Fig. S24** Scatter plot of each AIEgen (a) TPBIs, (b) TPFIs, (c) TPTIs and BODIPY493/503 Green in *Locusta migratoria* corpus adiposum. Pearson correlation coefficients  $R_r = 0.96$  (TPBIs),  $0.95$  (TPFIs) and  $0.96$  (TPTIs).

## 9. Colocalization imaging of *Caenorhabditis elegans*

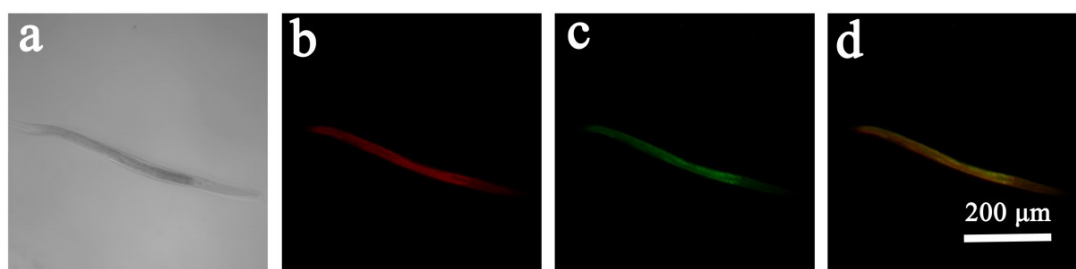

**Fig. S25** Colocalization imaging of *Caenorhabditis elegans* incubated with **TPFIs** and BODIPY493/503 Green. a) Bright-field, b) red channel and c) green channel. d) merged images of panels (b) and (c). For **TPFIs**,  $\lambda_{\text{ex}} = 488 \text{ nm}$ ,  $\lambda_{\text{em}} = 600\text{--}750 \text{ nm}$ ; For BODIPY 493/503,  $\lambda_{\text{ex}} = 488 \text{ nm}$ ,  $\lambda_{\text{em}} = 500\text{--}570 \text{ nm}$ . Concentrations: **TPFIs** ( $1 \times 10^{-6} \text{ M}$ ), BODIPY493/503 Green ( $1.0 \times 10^{-6} \text{ M}$ ).

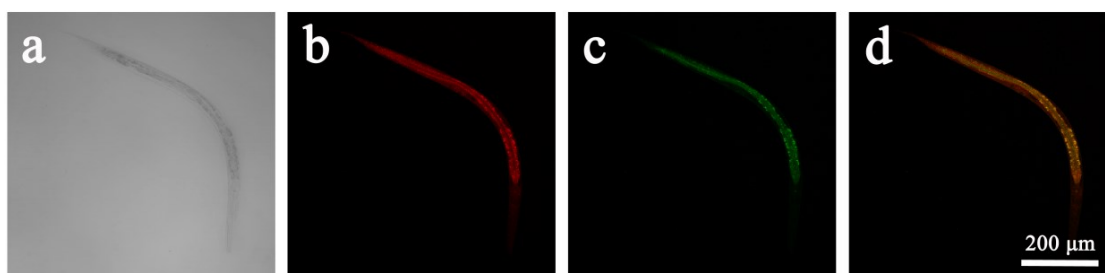

**Fig. S26** Colocalization imaging of *Caenorhabditis elegans* incubated with **TPTIs** and BODIPY493/503 Green. a) Bright-field, b) red channel and c) green channel. d) merged images of panels (b) and (c). For **TPTIs**,  $\lambda_{\text{ex}} = 488 \text{ nm}$ ,  $\lambda_{\text{em}} = 600\text{--}750 \text{ nm}$ ; For BODIPY 493/503,  $\lambda_{\text{ex}} = 488 \text{ nm}$ ,  $\lambda_{\text{em}} = 500\text{--}570 \text{ nm}$ . Concentrations: **TPTIs** ( $1 \times 10^{-6} \text{ M}$ ), BODIPY493/503 Green ( $1.0 \times 10^{-6} \text{ M}$ ).

## 10. Colocalization imaging of zebrafish

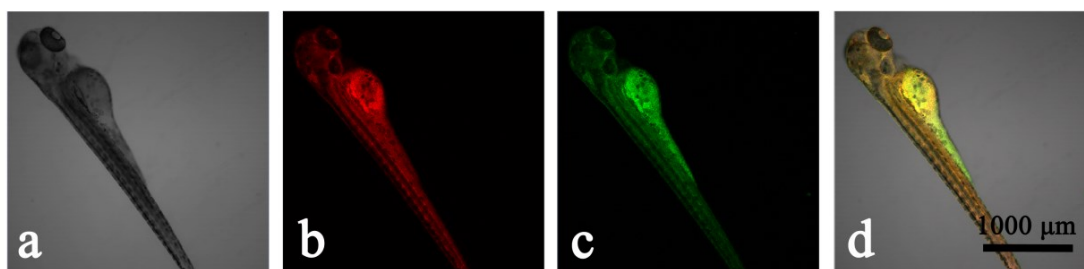

**Fig. S27** Colocalization imaging of zebrafish incubated with **TPFIs** and BODIPY493/503 Green. a) Bright-field, b) red channel and c) green channel. d) merged images of panels (b) and (c). For **TPFIs**,  $\lambda_{\text{ex}}=488$  nm,  $\lambda_{\text{em}}=600\text{--}750$  nm; For BODIPY 493/503,  $\lambda_{\text{ex}}=488$  nm,  $\lambda_{\text{em}}=500\text{--}570$  nm. Concentrations: **TPFIs** ( $1 \times 10^{-6}$  M), BODIPY493/503 Green ( $1.0 \times 10^{-6}$  M).

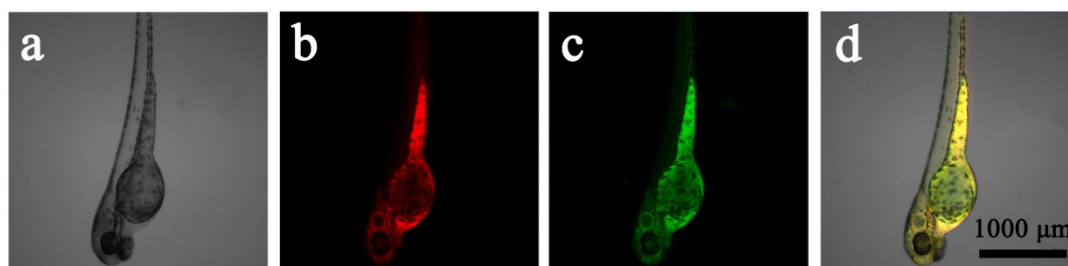

**Fig. S28** Colocalization imaging of zebrafish incubated with **TPTIs** and BODIPY493/503 Green. a) Bright-field, b) red channel and c) green channel. d) merged images of panels (b) and (c). For **TPTIs**,  $\lambda_{\text{ex}}=488$  nm,  $\lambda_{\text{em}}=600\text{--}750$  nm; For BODIPY 493/503,  $\lambda_{\text{ex}}=488$  nm,  $\lambda_{\text{em}}=500\text{--}570$  nm. Concentrations: **TPTIs** ( $1 \times 10^{-6}$  M), BODIPY493/503 Green ( $1.0 \times 10^{-6}$  M).

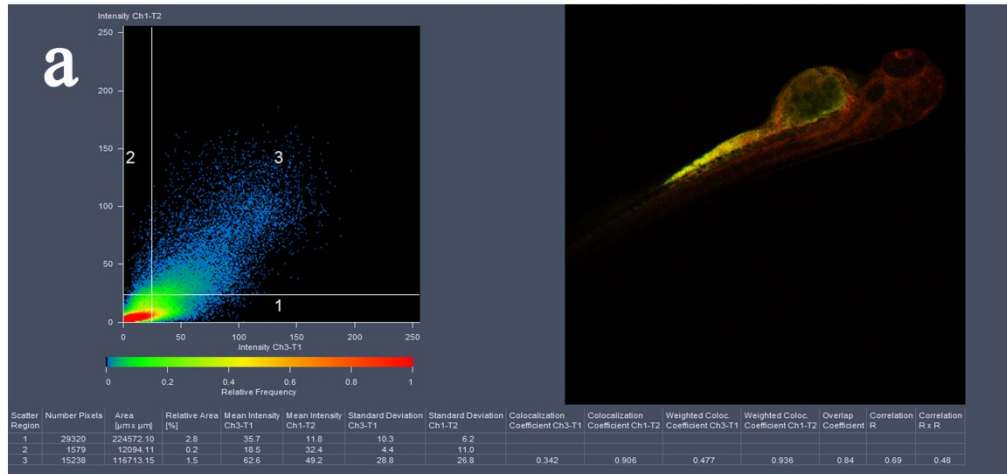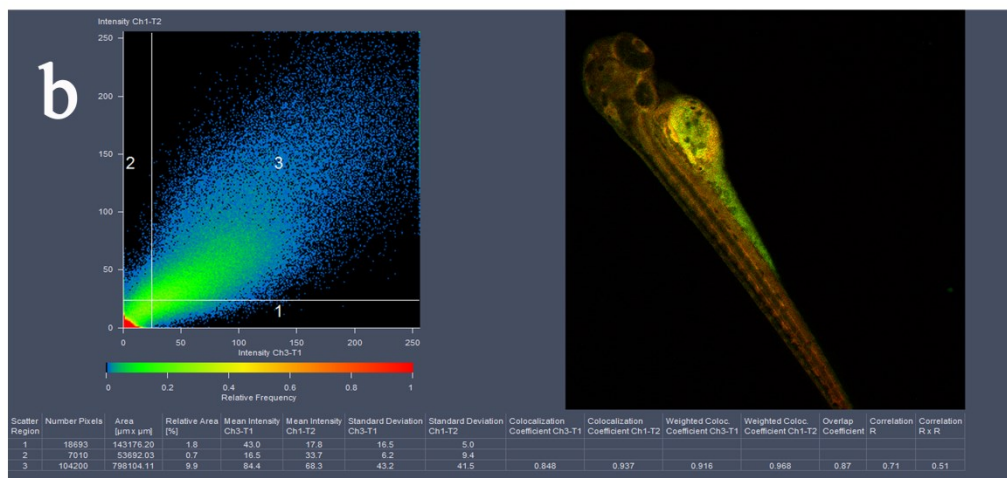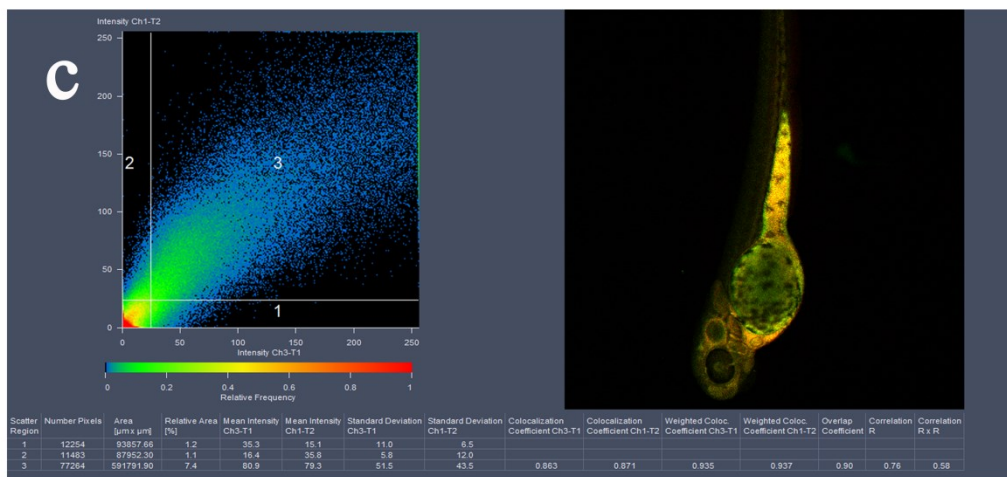

**Fig. S29** Scatter plot of each AIEgen (a) TPBIs, (b) TPFIs, (c) TPTIs and BODIPY493/503 Green in zebrafish. Pearson correlation coefficients  $R_r = 0.84$  (TPBIs),  $0.87$  (TPFIs) and  $0.90$  (TPTIs).



## 11. Colocalization imaging of sunflower

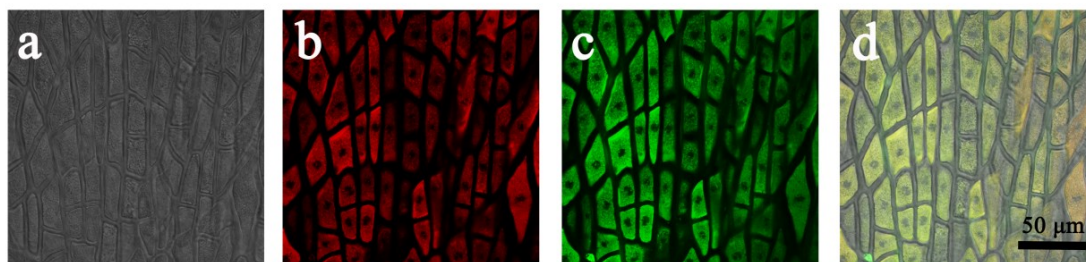

**Fig. S30** Colocalization imaging of sunflower seed coat incubated with **TPFIs** and BODIPY493/503 Green. a) Bright-field, b) red channel and c) green channel. d) merged images of panels (b) and (c). For **TPFIs**,  $\lambda_{\text{ex}} = 488 \text{ nm}$ ,  $\lambda_{\text{em}} = 600\text{--}750 \text{ nm}$ ; For BODIPY 493/503,  $\lambda_{\text{ex}} = 488 \text{ nm}$ ,  $\lambda_{\text{em}} = 500\text{--}570 \text{ nm}$ . Concentrations: **TPFIs** ( $1 \times 10^{-6} \text{ M}$ ), BODIPY493/503 Green ( $1.0 \times 10^{-6} \text{ M}$ ).

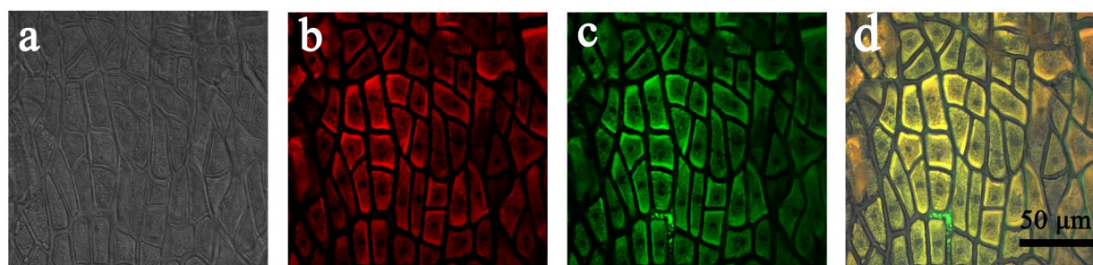

**Fig. S31** Colocalization imaging of sunflower seed coat incubated with **TPTIs** and BODIPY493/503 Green. a) Bright-field, b) red channel and c) green channel. d) merged images of panels (b) and (c). For **TPTIs**,  $\lambda_{\text{ex}} = 488 \text{ nm}$ ,  $\lambda_{\text{em}} = 600\text{--}750 \text{ nm}$ ; For BODIPY 493/503,  $\lambda_{\text{ex}} = 488 \text{ nm}$ ,  $\lambda_{\text{em}} = 500\text{--}570 \text{ nm}$ . Concentrations: **TPTIs** ( $1 \times 10^{-6} \text{ M}$ ), BODIPY493/503 Green ( $1.0 \times 10^{-6} \text{ M}$ ).

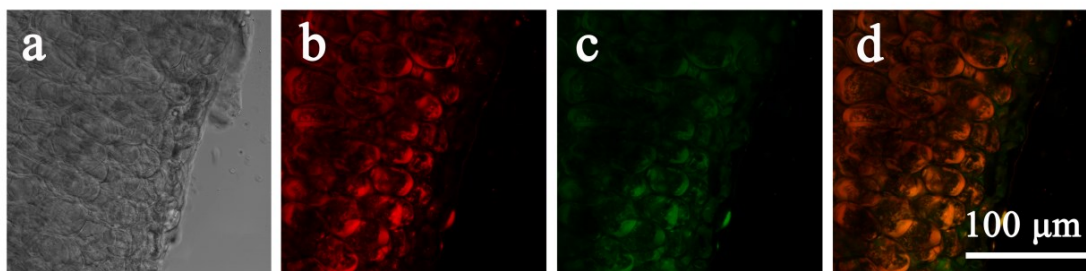

**Fig. S32** Colocalization imaging of sunflower seed in section **a** incubated with **TPFIs** and BODIPY493/503 Green. a) Bright-field, b) red channel and c) green channel. d) merged images of panels (b) and (c). For **TPFIs**,  $\lambda_{\text{ex}} = 488 \text{ nm}$ ,  $\lambda_{\text{em}} = 600\text{--}750 \text{ nm}$ ; For BODIPY 493/503,  $\lambda_{\text{ex}} = 488 \text{ nm}$ ,  $\lambda_{\text{em}} = 500\text{--}570 \text{ nm}$ . Concentrations: **TPFIs** ( $1 \times 10^{-6} \text{ M}$ ), BODIPY493/503 Green ( $1.0 \times 10^{-6} \text{ M}$ ).

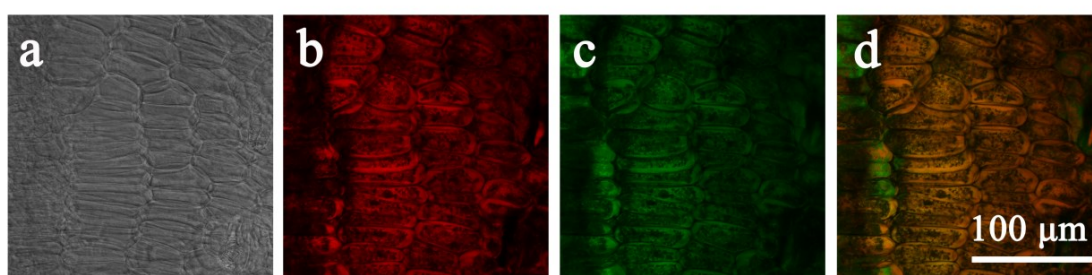

**Fig. S33** Colocalization imaging of sunflower seed in section **b** incubated with **TPFIs** and BODIPY493/503 Green. a) Bright-field, b) red channel and c) green channel. d) merged images of panels (b) and (c). For **TPFIs**,  $\lambda_{\text{ex}} = 488 \text{ nm}$ ,  $\lambda_{\text{em}} = 600\text{--}750 \text{ nm}$ ; For BODIPY 493/503,  $\lambda_{\text{ex}} = 488 \text{ nm}$ ,  $\lambda_{\text{em}} = 500\text{--}570 \text{ nm}$ . Concentrations: **TPFIs** ( $1 \times 10^{-6} \text{ M}$ ), BODIPY493/503 Green ( $1.0 \times 10^{-6} \text{ M}$ ).

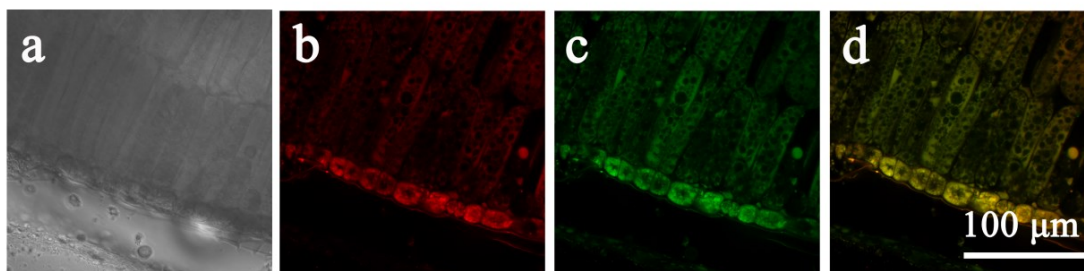

**Fig. S34** Colocalization imaging of sunflower seed in section **c** incubated with **TPFIs** and BODIPY493/503 Green. a) Bright-field, b) red channel and c) green channel. d) merged images of panels (b) and (c). For **TPFIs**,  $\lambda_{\text{ex}} = 488 \text{ nm}$ ,  $\lambda_{\text{em}} = 600\text{--}750 \text{ nm}$ ; For BODIPY 493/503,  $\lambda_{\text{ex}} = 488 \text{ nm}$ ,  $\lambda_{\text{em}} = 500\text{--}570 \text{ nm}$ . Concentrations: **TPFIs** ( $1 \times 10^{-6} \text{ M}$ ), BODIPY493/503 Green ( $1.0 \times 10^{-6} \text{ M}$ ).

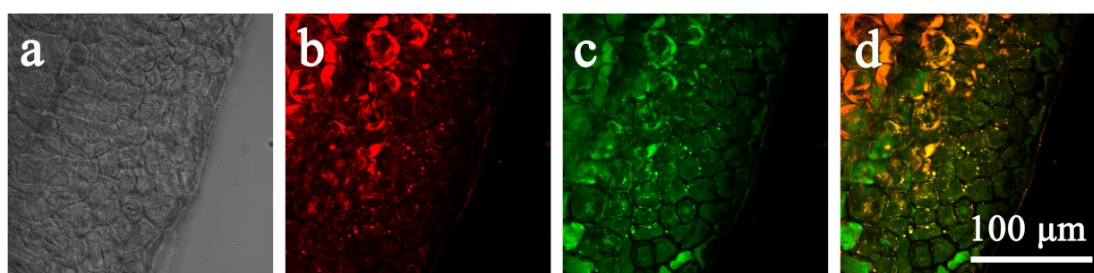

**Fig. S35** Colocalization imaging of sunflower seed in section **a** incubated with **TPTIs** and BODIPY493/503 Green. a) Bright-field, b) red channel and c) green channel. d) merged images of panels (b) and (c). For **TPTIs**,  $\lambda_{\text{ex}} = 488 \text{ nm}$ ,  $\lambda_{\text{em}} = 600\text{--}750 \text{ nm}$ ; For BODIPY 493/503,  $\lambda_{\text{ex}} = 488 \text{ nm}$ ,  $\lambda_{\text{em}} = 500\text{--}570 \text{ nm}$ . Concentrations: **TPTIs** ( $1 \times 10^{-6} \text{ M}$ ), BODIPY493/503 Green ( $1.0 \times 10^{-6} \text{ M}$ ).

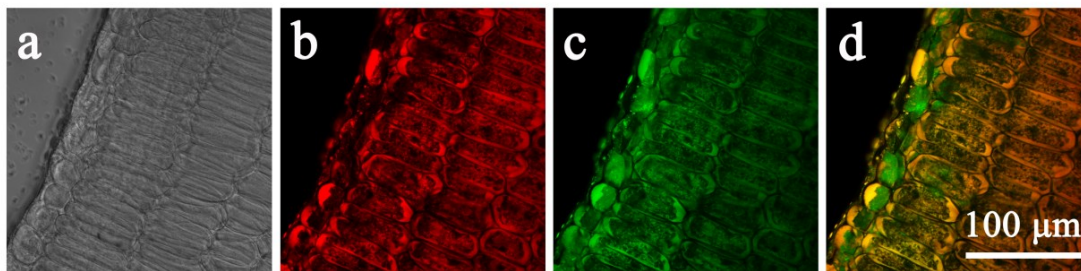

**Fig. S36** Colocalization imaging of sunflower seed in section **b** incubated with **TPTIs** and BODIPY493/503 Green. a) Bright-field, b) red channel and c) green channel. d) merged images of panels (b) and (c). For **TPTIs**,  $\lambda_{\text{ex}} = 488$  nm,  $\lambda_{\text{em}} = 600\text{--}750$  nm; For BODIPY 493/503,  $\lambda_{\text{ex}} = 488$  nm,  $\lambda_{\text{em}} = 500\text{--}570$  nm. Concentrations: **TPTIs** ( $1 \times 10^{-6}$  M), BODIPY493/503 Green ( $1.0 \times 10^{-6}$  M).

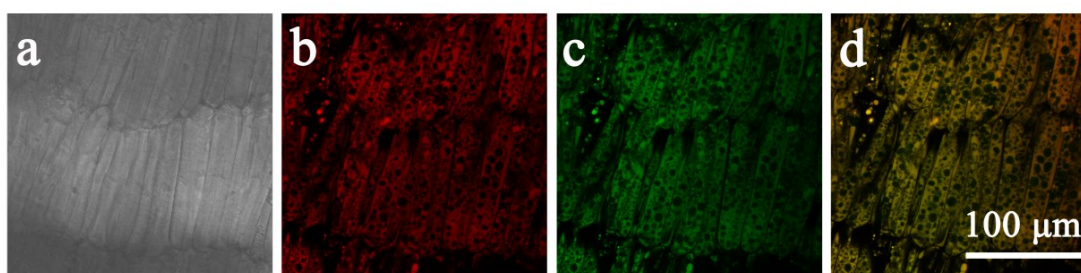

**Fig. S37** Colocalization imaging of sunflower seed in section **c** incubated with **TPTIs** and BODIPY493/503 Green. a) Bright-field, b) red channel and c) green channel. d) merged images of panels (b) and (c). For **TPTIs**,  $\lambda_{\text{ex}} = 488$  nm,  $\lambda_{\text{em}} = 600\text{--}750$  nm; For BODIPY 493/503,  $\lambda_{\text{ex}} = 488$  nm,  $\lambda_{\text{em}} = 500\text{--}570$  nm. Concentrations: **TPTIs** ( $1 \times 10^{-6}$  M), BODIPY493/503 Green ( $1.0 \times 10^{-6}$  M).



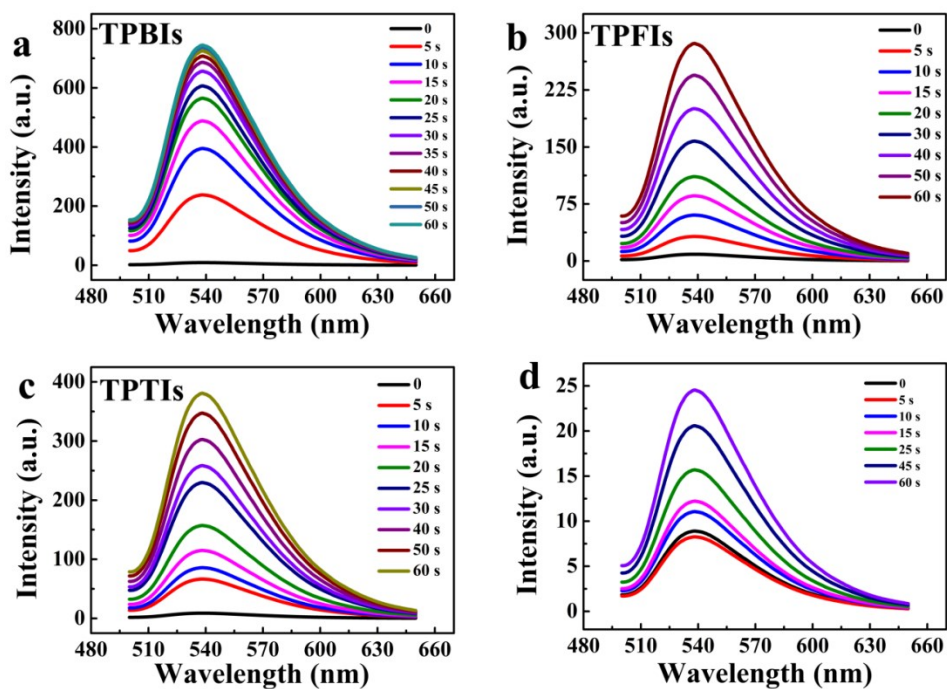

**Fig. S38** The fluorescence spectra of three AIEgens (a, b, c) in the presence of DCF-DA and the DCF-DA alone (d) at different light times, excitation wavelength: 488 nm.

**Table S1.** Crystal data and structure refinement of **TPTIs**.

| Identification code   | <b>TPTIs</b>       |
|-----------------------|--------------------|
| Empirical formula     | $C_{35}H_{29}N_3S$ |
| Formula weight        | 523.21             |
| Temperature / K       | 293(2)             |
| Wavelength / Å        | 0.71073            |
| Crystal system        | triclinic          |
| Space group           | P-1                |
| a / Å                 | 8.2367(7)          |
| b / Å                 | 12.9715(11)        |
| c / Å                 | 14.0133(12)        |
| $\alpha$ / °          | 86.405(4)          |
| $\beta$ / °           | 75.922(3)          |
| $\gamma$ / °          | 86.498(3)          |
| Volume $s/\text{Å}^3$ | 1447.8(2)          |
| Z                     | 2                  |

|                                                  |                                                   |
|--------------------------------------------------|---------------------------------------------------|
| Calculated density / mg / m <sup>3</sup>         | 1.134                                             |
| Absorption coefficient / mm <sup>-1</sup>        | 0.137                                             |
| F(000)                                           | 494                                               |
| Crystal size / mm <sup>3</sup>                   | 0.2×0.15×0.13                                     |
| Theta range for data collection / °              | 2.97 to 24.20                                     |
| Limiting indices                                 | -9≤h≤9, -14≤k≤14, -16≤l≤16                        |
| Reflections collected / unique                   | 10150 / 4017 [R <sub>int</sub> = 0.0477]          |
| Completeness to theta = 24.20                    | 86.2 %                                            |
| Absorption correction                            | None                                              |
| Refinement method                                | Full-matrix least-squares on F <sup>2</sup>       |
| Data / restraints / parameters                   | 4017/0/355                                        |
| Goodness-of-fit on F <sup>2</sup>                | 1.196                                             |
| Final R indices [I>2σ(I)]                        | R <sub>1</sub> = 0.1239, wR <sub>2</sub> = 0.2672 |
| R indices (all data)                             | R <sub>1</sub> = 0.1603, wR <sub>2</sub> = 0.2849 |
| Extinction coefficient                           | 0.036(6)                                          |
| Largest diff. peak and hole / e. Å <sup>-3</sup> | 0.417 and -0.396                                  |

**Table S2.** Data of bandgaps of theoretical study and cyclic voltammetry.

| Compound     | $E_{\text{oxd on eset}}$ V | $E_{\text{HOMO}}$ | $E_g^{\text{opt}}$ eV | $E_{\text{LUMO}}$ | HOMO <sup>DFT</sup> eV | LUMO <sup>DFT</sup> eV | $E_g^{\text{DFT}}$ eV |
|--------------|----------------------------|-------------------|-----------------------|-------------------|------------------------|------------------------|-----------------------|
| <b>TPBIs</b> | 0.82                       | -5.23             | 2.20                  | -3.03             | -5.13                  | -2.82                  | 2.31                  |
| <b>TPFIs</b> | 0.75                       | -5.16             | 2.00                  | -3.16             | -5.01                  | -2.74                  | 2.27                  |
| <b>TPTIs</b> | 0.76                       | -5.17             | 2.05                  | -3.12             | -5.11                  | -2.81                  | 2.30                  |

$$E_{\text{HOMO}} = -e \left( E_{\text{oxd on eset}} + \frac{4.41}{c} \right) \text{ V};$$

$$E_g^{\text{opt}} = h \times f = h \times \frac{\lambda_{a.e.}}{1240} \approx \lambda_{a.e.};$$

$$E_{\text{LUMO}} = E_{\text{HOMO}} + E_g^{\text{opt}}.$$

**Table S3.** Photophysical properties of LDs probes and their applications.

| Dye <sup>[ref]</sup>                  | $\lambda_{ex}/\lambda_{em}$ , nm | $\epsilon$ , M <sup>-1</sup> ,<br>cm <sup>-1</sup> | Application                                                                                                      |
|---------------------------------------|----------------------------------|----------------------------------------------------|------------------------------------------------------------------------------------------------------------------|
| Nile Red <sup>[2]</sup>               | 553/635 (MeOH)                   | 44,000                                             | Cells                                                                                                            |
| PyrPy 10d <sup>[3]</sup>              | 356/449 (CHCl <sub>3</sub> )     | 12,400                                             | Cells                                                                                                            |
| PyrPy 11c                             | 344/447 (CHCl <sub>3</sub> )     | 13,200                                             | Cells                                                                                                            |
| AF8 <sup>[4]</sup>                    | 380/479 (DMSO)                   | n.r.                                               | Cells                                                                                                            |
| AFN                                   | 428/592 (DMSO)                   | n.r.                                               | Cells                                                                                                            |
| AF10                                  | 356/477 (DMSO)                   | n.r.                                               | Cells                                                                                                            |
| NAP-Ph <sup>[5]</sup>                 | 409/523 (water)                  | n.r.                                               | imaging in cells and tissues                                                                                     |
| NAP-Br                                | 409/525 (water)                  | n.r.                                               | imaging in cells and tissues                                                                                     |
| NAP-CF <sub>3</sub>                   | 425/560 (water)                  | n.r.                                               | imaging in cells and tissues                                                                                     |
| NAP-Py                                | 413/541 (water)                  | n.r.                                               | imaging in cells and tissues                                                                                     |
| Phos 2a <sup>[6]</sup>                | 439/554 (DMSO)                   | n.r.                                               | Cells                                                                                                            |
| Phos 3a                               | 429/512 (DMSO)                   | n.r.                                               | Cells                                                                                                            |
| Phos 2b                               | 437/554 (DMSO)                   | n.r.                                               | Not applicable for cells                                                                                         |
| Phos 3b                               | 374/550 (DMSO)                   | n.r.                                               | Not applicable for cells                                                                                         |
| FAS <sup>[7]</sup>                    | 322/600 (water)                  | n.r.                                               | Cells                                                                                                            |
| DPAS                                  | 301/550 (water)                  | n.r.                                               | Cells                                                                                                            |
| BTD-Lip <sup>[8]</sup>                | 455/624 (MeCN)                   | 7586                                               | Cells and worms                                                                                                  |
| TPMN <sup>[9]</sup>                   | 441/637 (solid)                  | n.r.                                               | Cells, zebrafish imaging and therapy                                                                             |
| TTMN                                  | 483/672 (solid)                  | n.r.                                               | Cells, zebrafish imaging and therapy                                                                             |
| MeTTMN                                | 441/681 (solid)                  | n.r.                                               | Cells, zebrafish imaging and therapy                                                                             |
| MeOTTMN                               | 499/701 (solid)                  | n.r.                                               | Cells, zebrafish imaging and therapy                                                                             |
| DCMa <sup>[10]</sup>                  | 478/665 (water)                  | n.r.                                               | 1PE and 2PE imaging in cells                                                                                     |
| DCIs                                  | 510/709 (water)                  | n.r.                                               | 1PE and 2PE imaging in cells                                                                                     |
| DCFu                                  | 538/755 (water)                  | n.r.                                               | 1PE and 2PE imaging in cells                                                                                     |
| SMCy3 <sup>[11]</sup>                 | 528/550 (toluene)                | 94,000                                             | Cells and tissue imaging                                                                                         |
| SMCy3.5                               | 551/572 (toluene)                | 124,000                                            | Cells and tissue imaging                                                                                         |
| SMCy5                                 | 615/642 (toluene)                | 203,000                                            | Cells and tissue imaging                                                                                         |
| SMCy5.5                               | 634/661 (toluene)                | 168,000                                            | Cells and tissue imaging                                                                                         |
| SMCy7                                 | 683/721 (toluene)                | 109,000                                            | Cells and tissue imaging                                                                                         |
| SMCy7.5                               | 705/746 (toluene)                | 89,000                                             | Cells and tissue imaging                                                                                         |
| PEG-NBD <sup>[12]</sup>               | 470/521 (toluene)                | n.r.                                               | discrimination living and dead cells                                                                             |
| TPA-SD <sup>[13]</sup>                | 400/550 (water)                  | n.r.                                               | diagnosis diseases related to LDs                                                                                |
| DPFB-NMe <sub>2</sub> <sup>[14]</sup> | 435/578 (DMSO)                   | n.r.                                               | Cells and zebrafish                                                                                              |
| TTNIR <sup>[15]</sup>                 | 512/724 (ACN)                    | n.r.                                               | cellular imaging and therapy                                                                                     |
| TPBIs (this work)                     | 494/666 (toluene)                | 22,800                                             | Cells, excised adipose tissues, zebrafish, <i>Caenorhabditis elegans</i> , sunflower kernels imaging and therapy |
| TPFIs (this work)                     | 549/683 (toluene)                | 43,900                                             | Cells, excised adipose tissues, zebrafish, <i>Caenorhabditis elegans</i> , sunflower kernels imaging and therapy |
| TPTIs (this work)                     | 547/684 (toluene)                | 32,800                                             | Cells, excised adipose tissues, zebrafish, <i>Caenorhabditis elegans</i> , sunflower kernels imaging and therapy |

## References

- 1 Y. Li, T. Ren and W. J. Dong, *J. Photochem, Photobiol.*, 2013, **251**, 1–9.
- 2 P. Greenspan, E. P. Mayer, S. D. Fowler, *J. Cell Biol.*, 1985, **100**, 965–973.
- 3 E. Wang, E. Zhao, Y. Hong, J. W. Y. Lam and B. Z. Tang, *J. Mater. Chem. B*, 2014, **2**, 2013–2019.
- 4 A. Sharma, S. Umar, P. Kar, K. Singh, M. Sachdev and A. Goel, *Analyst*, 2016, **141**, 137–143.
- 5 G. Niu, R. Zhang, J. P. C. Kwong, J. W. Y. Lam, C. Chen, J. Wang, Y. Chen, X. Feng, R. T. K. Kwok, H. H. Y. Sung, I. D. Williams, M. R. J. Elsegood, J. Qu, C. Ma, K. S. Wong, X. Yu and B. Z. Tang, *Chem. Mater.*, 2018, **30**, 4778–4787.
- 6 E. Öberg, H. Appelqvist and K. P. R. Nilsson, *Front. Chem.*, 2017, **5**.
- 7 Z. Wang, C. Gui, E. Zhao, J. Wang, X. Li, A. Qin, Z. Zhao, Z. Yu and B. Z. Tang, *ACS Appl. Mater. Interfaces*, 2016, **8**, 10193–10200.
- 8 A. A. R. Mota, J. R. Correa, L. P. de Andrade, J. A. F. Assumpção, G. A. de Souza Cintra, L. H. Freitas-Junior, W. A. da Silva, H. C. B. de Oliveira and B. A. D. Neto, *ACS Omega*, 2018, **3**, 3874–3881.
- 9 D. Wang, H. Su, R. T. K. Kwok, G. Shan, A. C. S. Leung, M. M. S. Lee, H. H. Y. Sung, I. D. Williams, J. W. Y. Lam and B. Z. Tang, *Adv. Funct. Mater.*, 2017, **27**, 1704039.
- 10 Z. Zheng, T. Zhang, H. Liu, Y. Chen, R. T. K. Kwok, C. Ma, P. Zhang, H. H. Y. Sung, I. D. Williams, J. W. Y. Lam, K. S. Wong and B. Z. Tang, *ACS Nano.*, 2018, **12**, 8145–8159.
- 11 M. Collot, T. K. Fam, P. Ashokkumar, O. Faklaris, T. Galli, L. Danglot and A. S. Klymchenko, *J. Am. Chem. Soc.*, 2018, **140**, 5401–5411.
- 12 F. Yu, X. Jing and W. Lin, *Sens. Actuators, B*, 2020, **302**, 127207.
- 13 J. Shi, Y. Tian, B. Guo, Y. Wu, J. Jing, R. Zhang and X. Zhang, *Sens. Actuators, B*, 2019, **284**, 545–552.
- 14 N. Zhao, C. Ma, W. Yang, W. Yin, J. Wei and N. Li, *Chem. Commun.*, 2019, **55**, 8494–8497.
- 15 W. Xu, M. M. S. Lee, Z. Zhang, H. H. Y. Sung, I. D. Williams, R. T. K. Kwok, J. W. Y. Lam, D. Wang and B. Z. Tang, *Chem. Sci.*, 2019, **10**, 3494–3501.
